# Supplementary material for: A Hadal Streptomyces-Derived Echinocandin Acylase Discovered through the Prioritization of Protein Families
Source: MDPI journal article supplement (doi:10.3390/md22050212), 2024-05-07
Supplement: s1 [file s1]

## Supplementary Materials

# A hadal *Streptomyces*-derived echinocandin acylase discovered through prioritization of protein families

Xuejian Jiang<sup>1</sup>, Hongjun Shu<sup>1</sup>, Shuting Feng<sup>1</sup>, Pinmei Wang<sup>1,2</sup>, Zhizhen Zhang<sup>1</sup> and Nan Wang<sup>1,2,\*</sup>

### Table of Contents

|                                                                                                                                                                                                                                                                                                                                                                                                                         |    |
|-------------------------------------------------------------------------------------------------------------------------------------------------------------------------------------------------------------------------------------------------------------------------------------------------------------------------------------------------------------------------------------------------------------------------|----|
| <b>Table S1.</b> Marine derived proteins clustered with the probe FR9013179 acylase in SNN generated by EFI-EST .....                                                                                                                                                                                                                                                                                                   | 3  |
| <b>Table S2.</b> Strains and plasmids used in this study.....                                                                                                                                                                                                                                                                                                                                                           | 3  |
| <b>Table S3.</b> Primers used in this study.....                                                                                                                                                                                                                                                                                                                                                                        | 4  |
| <b>Table S4.</b> DNA fragments for assembling the <i>ecea</i> expressing cassette .....                                                                                                                                                                                                                                                                                                                                 | 4  |
| <b>Table S5.</b> Amino acid sequence of ECEA including the signal peptide.....                                                                                                                                                                                                                                                                                                                                          | 5  |
| <b>Figure S1.</b> HPLC profiles showing the deacylation activity of ECE and FR901379 by the hadal bacterium <i>Streptomyces</i> sp. SY1965 (a, c) and the recombinant echinocandin E acylase (ECEA) overproducing strain (TKecea66)(b, d). .....                                                                                                                                                                        | 7  |
| <b>Figure S2.</b> High-resolution mass spectra showing the production of deacylated products of ECEN and FR179642 from substrates ECE and FR901379, respectively. ....                                                                                                                                                                                                                                                  | 8  |
| <b>Figure S3.</b> Construction of the <i>ecea</i> gene overexpression plasmid for intergeneric conjugation. The DNA fragment (2415 bp) amplified from the genomic DNA of <i>Streptomyces</i> sp. SY1965 (a); PCR verification of recombinant plasmid pSET- <i>kasOp</i> <sup>*</sup> ECEA (b). M: DNA Marker; left gel: lanes 1-9 are <i>E. coli</i> /DH5α transformants; Lane 9 represents the correct construct. .... | 9  |
| <b>Figure S4.</b> Plasmid map of pSET- <i>kasOp</i> <sup>*</sup> ECEA. The <i>ecea</i> gene expression cassette consists of the <i>KasOp</i> <sup>*</sup> (with RBS) promoter, structure gene of <i>ecea</i> , 6×His tag and the Lambda T0 terminator. ....                                                                                                                                                             | 10 |
| <b>Figure S5.</b> Schematic diagram showing the integration site of the <i>ecea</i> gene and                                                                                                                                                                                                                                                                                                                            |    |

PCR verification of the expression cassette on the chromosome of the recombinant strain, *Streptomyces lividans* TKecea66.....10

**Figure S6.** PCR verification of the genotype of *S. lividans* TKecea66. Agarose (1%)/TAE gel electrophoresis showing the upstream (**a**) and downstream (**b**) junctions flanking the *eceA* gene. M: DNA Marker; lines 1-8: exconjugants; line 9: *S. lividans* TK24; line 10: exconjugant with empty plasmid.....11

**Figure S7.** SDS-PAGE analysis of the ECEA produced by the recombinant strain *Streptomyces lividans* TKecea66. M: Marker; Lane 1: supernatant of *S. lividans* TK24; lane 2: supernatant of TKecea66; lane 3: *S. lividans* TK24 transferred with an empty pSET152 vector; lane 4: fractions eluted with buffer containing 20 mM imidazole; Lane 5: fractions eluted with buffer containing 50 mM imidazole; line 6: fractions eluted with buffer containing 100 mM imidazole; line 7: fractions eluted with buffer containing 300 mM imidazole; line 8: fractions eluted with buffer containing 500 mM imidazole.....11

**Figure S8.** Multiple sequence alignment of ECEA, hypothetical ECE acylases (blue), known proteins (red) and a cephalosporin C acyltransferase (CAD, GenBank accession number: AF251710.1, green). Key catalytic sites marked with red stars and active pocket residues marked with triangles. echinocandin B acylase gene (GenBank accession numbers: BD226911, AB158476.1, HM851181, D10610). ...12

**Figure S9.** Comparison of the structures of ECEA (green) and CPC (orange, PDB code: 1JVZ), RMSD= 2.469. ECEA was generated by Alphafold2. ....13

**Figure S10.** The structure (a) of ECE and CPC protein docking that  $\alpha$ -subunit colored by light blue and  $\beta$ -subunit colored by light pink, and shown the key residues (cyan) surrounding substrate of ECE (yellow) within 6 Å (b). ....13

**References** .....14

**Table S1.** Marine derived proteins clustered with the probe FR9013179 acylase in SNN generated by EFI-EST

| Origin                                                     | UniProt ID |
|------------------------------------------------------------|------------|
| Unknown proteins of intertidal origins                     | A0A2S1I7W9 |
|                                                            | A0A1S2PKA0 |
|                                                            | A0A2M9LMP4 |
|                                                            | A0A1Q5BWW0 |
|                                                            | A0A1Q5GMV2 |
| Unknown sponge co-epiphytic microbial proteins             | A0A3N6H9K9 |
|                                                            | A0A3N6DWY1 |
|                                                            | A0A3G4VTM0 |
|                                                            | A0A101URM3 |
| Unknown microbial proteins derived from seafloor sediments | A0A4R1DSC3 |
|                                                            | H0BNF0     |
|                                                            | A0A3S9PDQ3 |
|                                                            | A0A1V0UK48 |
|                                                            | A0A6I6WZB9 |
|                                                            | A0A941FGI5 |
|                                                            | A0A1E7LNN9 |
| Hadal origin protein studied                               | F3NT93     |
|                                                            | ECEA*      |

\*not a UniProt accession ID

**Table S2.** Strains and plasmids used in this study.

| Strain / Plasmid                          | Function                             | Source              |
|-------------------------------------------|--------------------------------------|---------------------|
| <i>E. coli</i> DH5 $\alpha$               | Subcloning                           | In-house collection |
| <i>E. coli</i> ET12567(PUZ8002)           | Intergeneric Conjugation             | In-house collection |
| <i>Streptomyces lividans</i> TK24         | Host for ECEA production             | In-house collection |
| <i>Streptomyces</i> sp. SY1965            | Cloning of the <i>ece</i> a gene and | [15]                |
|                                           | biotransformation of                 |                     |
| pSET- <i>kasOp</i> <sup><i>ece</i>a</sup> | ECE/FR9013179                        |                     |
| <i>Aspergillus nidulans</i> LO8030-5.1    | Conjugal transformation plasmid      | This study          |
|                                           | ECE production                       |                     |
| <i>Streptomyces lividans</i> TKecea66     | [9]                                  | This study          |
|                                           | Biotransformation of                 |                     |
|                                           | ECE/FR9013179                        |                     |

**Table S3.** Primers used in this study.

| Primer   | Nucleotide Sequence (5'-3')              | Function                       |
|----------|------------------------------------------|--------------------------------|
| ECEA_F1  | gcctaagatgacgttacgcaaccgctctgagactgc     | <i>ecce</i> gene amplification |
| ECEA_R1  | ctagtgggtgggtgggtgggtgccgcgctcgtgcac     | <i>ecce</i> gene amplification |
| ECEA_F2  | caccaccaccaccaccactagactccatctggatttgttc | Overlap integration            |
| ECEA_R2  | gctgaacgggggggttcgtgcacaca               | Overlap integration            |
| ECEAyz_F | ttgtaaaacgacggccagtgccaagct              | Genotype PCR verification      |
| ECEAyz_R | atgcttccggctcgtatgttgtgtgg               | Genotype PCR verification      |
| pSL_F5   | cacgttttcccagggtcagaagc                  | Genotype PCR verification      |
| pSL_R5   | atgctcaactaaagtggggcg                    | Genotype PCR verification      |
| pSL_F7   | gaccatcgtgatcggcgtgt                     | Genotype PCR verification      |
| pSL_R7   | gcgctcgagccgcataatcagg                   | Genotype PCR verification      |

**Table S4.** DNA fragments for assembling the *ecfa* expressing cassette

| Fragment                                 | DNA sequence (5'-3')                                                                                                                                                                                                                                                                                                                                                                                                                                                                                                                                                                                                                                                                                                                                                                                                                                                                                                                                                                                                                                                                                                                                                                                                                                                                                                                                                                                                                                                                                                                                                                                                                                                                                                                                                                                                                                                                                                                                                                                                                                                                                                                                                                                                                                                                                                                                                                                                                                                                                                                                                                                                                                                                                                                                                                                                                                                                                                                                                                                                      |
|------------------------------------------|---------------------------------------------------------------------------------------------------------------------------------------------------------------------------------------------------------------------------------------------------------------------------------------------------------------------------------------------------------------------------------------------------------------------------------------------------------------------------------------------------------------------------------------------------------------------------------------------------------------------------------------------------------------------------------------------------------------------------------------------------------------------------------------------------------------------------------------------------------------------------------------------------------------------------------------------------------------------------------------------------------------------------------------------------------------------------------------------------------------------------------------------------------------------------------------------------------------------------------------------------------------------------------------------------------------------------------------------------------------------------------------------------------------------------------------------------------------------------------------------------------------------------------------------------------------------------------------------------------------------------------------------------------------------------------------------------------------------------------------------------------------------------------------------------------------------------------------------------------------------------------------------------------------------------------------------------------------------------------------------------------------------------------------------------------------------------------------------------------------------------------------------------------------------------------------------------------------------------------------------------------------------------------------------------------------------------------------------------------------------------------------------------------------------------------------------------------------------------------------------------------------------------------------------------------------------------------------------------------------------------------------------------------------------------------------------------------------------------------------------------------------------------------------------------------------------------------------------------------------------------------------------------------------------------------------------------------------------------------------------------------------------------|
| The coding<br>sequence of<br><i>eceA</i> | <p>             ttgacgttacgaaccgctctgagactgctcggggctcgccggtctcgccctgttcaccgtgtcggcctcgtcgtccgccc<br/>             ggccgcccgttcggggccgggcccacagcggcacccgtccggcgcggggtcttcggcgtcatccggtacacg<br/>             gagtacggcattccgcacatcgtggcgaaggactacgcgcagctcggcttcggcacccggctggggcgaggcggg<br/>             ccgaccagggtgtgcacgctggcggaacggtttctcacggtgcgcgggggaacggtcgaggttcttcggcccggac<br/>             gccgccccggacttctcgtctctcctcgcgcgacgaacctctcagcgaatctgtacttcgggggtgtccgggaca<br/>             gcgggcacgggtggagaagctgtcgaaggtgcccgcgcccgcgggtccgagccgggacgccaaggagacgatg<br/>             cgcggggttcgcccggggtacaaacgcgtggatccagcagaaccggatcacccgatccggcctgccggggcgcggt<br/>             cctgggtccgtccgggtgacggcgctggacgtggcgggcgcgcggtacgcgtggccgtgctcggcggtcagggg<br/>             gcgcggcatcgacggcatcacggcgcgcgcgccgaccccgctccccggcgggcggggggtcacgccga<br/>             ggaggcgcgacggcgccgagcggctgtgtcggcgcagaacgcggacatgggtccaacgcgggtggcctt<br/>             cgacgggtccaccacgggtgaacggcgcggggtgtgtgtcggcaaccgcactaccgtggcaggggcgagcgc<br/>             cgcttctggcagtcgcagcagaccattcccgggtgagctgaacgtgtcgggtgctgcctgtctgggcgccacgacg<br/>             atctgatcgggcacaacgcggatgtggcgtggagccatacgggtcgccacgggcgctacgctgaatctgcatca<br/>             gctgacgctggatccggccgaccgcaccagctatctggtggacggggaagcgggagcggatgacgaagcggac<br/>             ggtgagcgtcccgggtgaagggcgcggtcccgtgacccgcacccagtgtgtggacgcgtacggcccgggtcgtc<br/>             gactccatgggctcggcgctgcggttgcgtggacggcgagcacggcgctacgccctgaacgaccgaaacgcga<br/>             cgaatctcggtatggcggaacaccgggtctgggcttcagcagggcccgtccacggcgagctggaacgctcact<br/>             gcaccggaaccaggggcatgccgtgggtgaacacgatcgcgcgacggggcggggcaactcgttcttcgccag<br/>             tcgagggtcctgccgaggatcacggacgagctggcgagcgctgtcgcaccgcgtgggcccgggcccacgtatc<br/>             cggcgtccgggtcggcggtgtggacggctcgcgcgaggactgcgcgtgggcagcgaaccggacgcgggtgc<br/>             agtcgggcatcttcggcccagccgatgccacgtcaagaaccggccgtacgtggagaactcaacgacagc<br/>             gctgggtgaccaacgcggagcagccgctgacgggtacgagcgggtcttcggcacggtcgcgacgcccgggt<br/>             cgatgcggacgcgtggcgcatcgaggatgtcgggagatggcggacaagggccgctccgggtcgcggatc<br/>             tcacggcgagcagttcgcaaccgtgcgcggccggcgacctggccgcgtcggagacggcggggttggtgcg<br/>             cggcgctgcggggcgacggccgtgggcacggcggttacccgggtcgaatgtgtcggaggcctgccgggtgc<br/>             tgcggcgctgggacggagcgtggacagcgacagccggggcgcgctgtcttcgacgggttctggcgagggg<br/>             cctcggcggtgcccgcccgagctgtggcgaccccggttcgacccggcgacccgggtgcgcacccgcgcgggt<br/>             ctgaacaccgccgcgggggtgtcggcacggcgctggcgacgcgggtgacggagctcggggcgggcgggcat<br/>             cacgctcgacgcaccgctgggcaagcaccagttctgtgggtccggaacggcaagcggtcccgatcggcgggcg<br/>             acggagtgcgtggcatctggaacaagaccgagccggtgtggaacgcggcgcgggcggtatcacggagggtg<br/>             tcgacgggtccagctacatccaggcggtcggctgggacgacagccgctgccgggtggccggacgctgtga<br/>             cgtactcccagtcggagaaccggaagtgcgccacttcagcgaccagaccggctgtacggggcgagcgctg           </p> |

|                      |                                                                                                   |
|----------------------|---------------------------------------------------------------------------------------------------|
|                      | ggtgacgtcccgggttctgcgagaaggacatcgcccgtcgccggccctgcgggtggtgcgggtgcacgagcggcggttag                  |
| <i>KasOp</i> *       | tggtcacattcgaacgggtctctgcttgacaacatgctgtgcgggtgtgtaaagtcgtggccaggagaatacgacagcgtgcaggactgggggagtt |
| 6×His                | caccaccaccaccac                                                                                   |
| lambda t0 terminator | actccatctggatttggtcagaacgctcggttgccgccgggcgtttttat                                                |

**Table S5.** Amino acid sequence of ECEA including the signal peptide

| Amino acid sequence                                                                                                                                                                                                                                                                                                                                                                                                                                                                                                                                                                                                                                                                                                                                                                                                                                                                       |
|-------------------------------------------------------------------------------------------------------------------------------------------------------------------------------------------------------------------------------------------------------------------------------------------------------------------------------------------------------------------------------------------------------------------------------------------------------------------------------------------------------------------------------------------------------------------------------------------------------------------------------------------------------------------------------------------------------------------------------------------------------------------------------------------------------------------------------------------------------------------------------------------|
| LTLRNRLRLLGVAGLALFTVSASLPAAASGAGPQRHPSGGGLSAVIRYTEYGIPHIVAKDY<br>AQLGFGTGWAQAADQVCTLADGFLTVRGERSRFFGPD AAPDFSLSSAATNLSSDLYFRGV<br>RDSGTVEKLLKVPAPAGPSRDAKETMRGFAAGYN AWIQQNRITDPACRGASWVRPVTAL<br>DVAARGYALAVLGGQGRGIDGITAARPPTAAPPAAGVTPEEAATAAERLLSAQNADMGS<br>NAVAFDGSTTVNGRGLLLGNPHYPWQGRRFWQSQQTIPGELNVSGASLLGATTISIGHN<br>ADVAWSHTVATGVTLNLHQLTDPADPTTYLVDGKRERMTKRTVSVPVKGAAPVTRTQ<br>WWTRYGPVVDSMGSALPLPWTASTAYALNDPNATNLRMADTGLGFSRARSTADVERSLH<br>RNQGMPWVNTIAADRAGHSFFAQSQVLPRITDELAERCSTALGRATYPASGLAVLDGSRE<br>DCALGSDPDAVQSGIFGPSRMPTLKNRPYVENSND SAWLTNAEQPLTGYERVFGTVATPR<br>SMRTRGAIEDVAEMADKGRLRVADLQRQQFANRAPAGDLAASETAGWCAALPGGTAVG<br>TGGTPVDVSEACRVLRRWDRSVDSDSRGALLFDRFWRRASAVPAAELWRTPFDPADPVRT<br>PRGLNTAAPGVGTALADAVTELRAAGITLDAPLGKHQFVVRNGKRLPIGGGTESLGIWNK<br>TEPVWNAAAGGYTEVSTGSSYIQAVGWDDSRCPVARTLLTYSQSENPKSPHFSDQTRLYAG<br>ERWVTSRFCEKDIARSPALRVVRVHERR* |

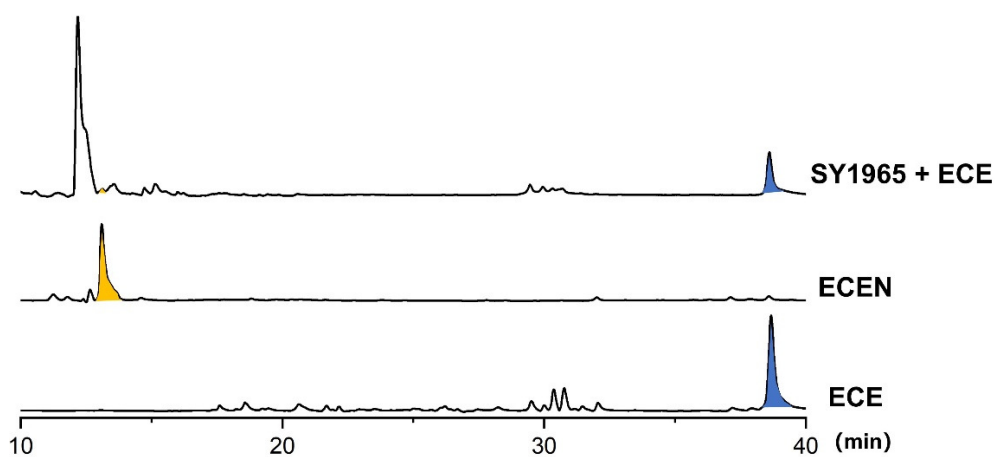

(a)

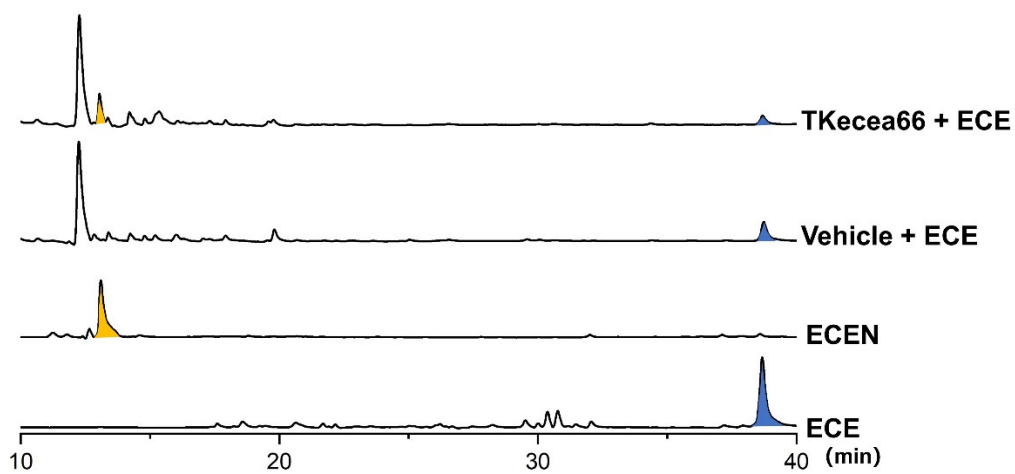

(b)

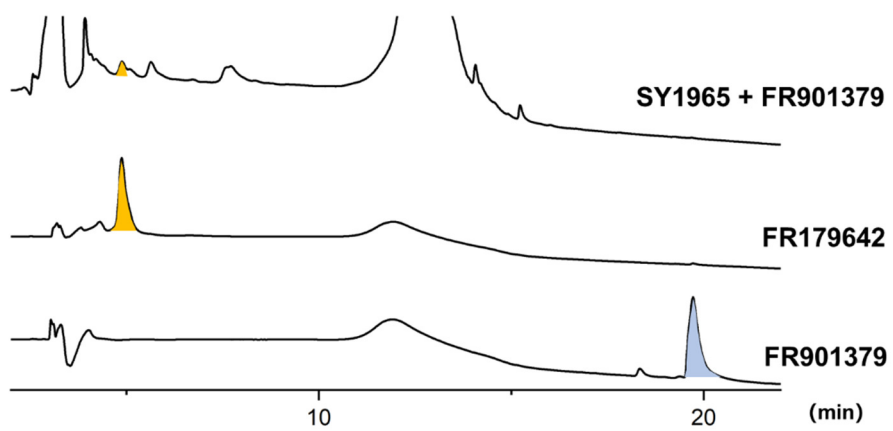

(c)

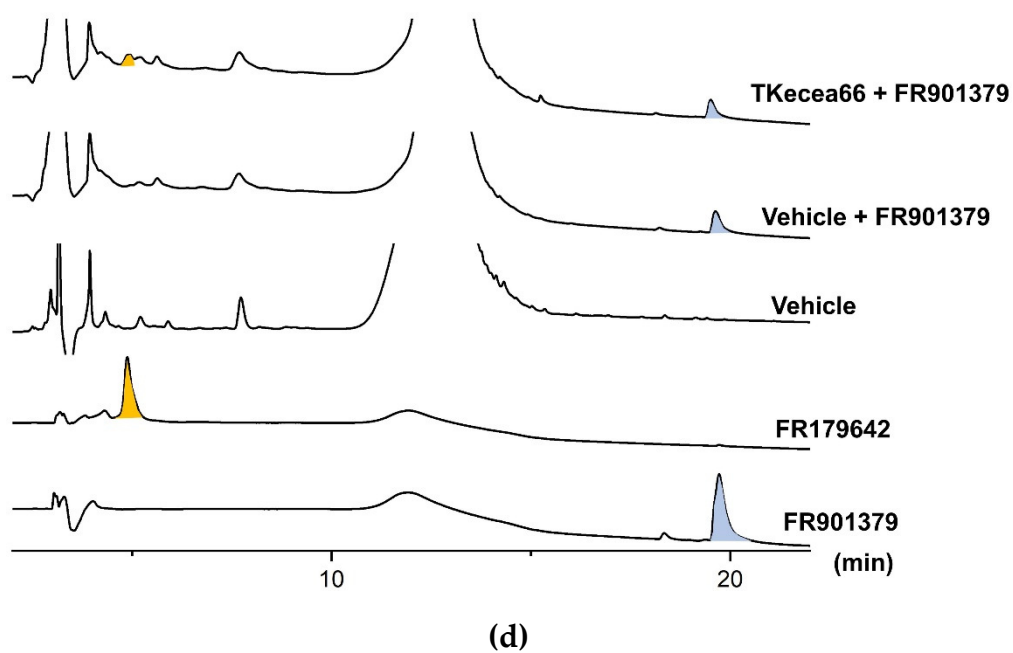

**Figure S1.** HPLC profiles showing the deacylation activity of ECE and FR901379 by the hadal bacterium *Streptomyces* sp. SY1965 (a, c) and the recombinant echinocandin E acylase (ECEA) overproducing strain (TKecea66)(b, d).

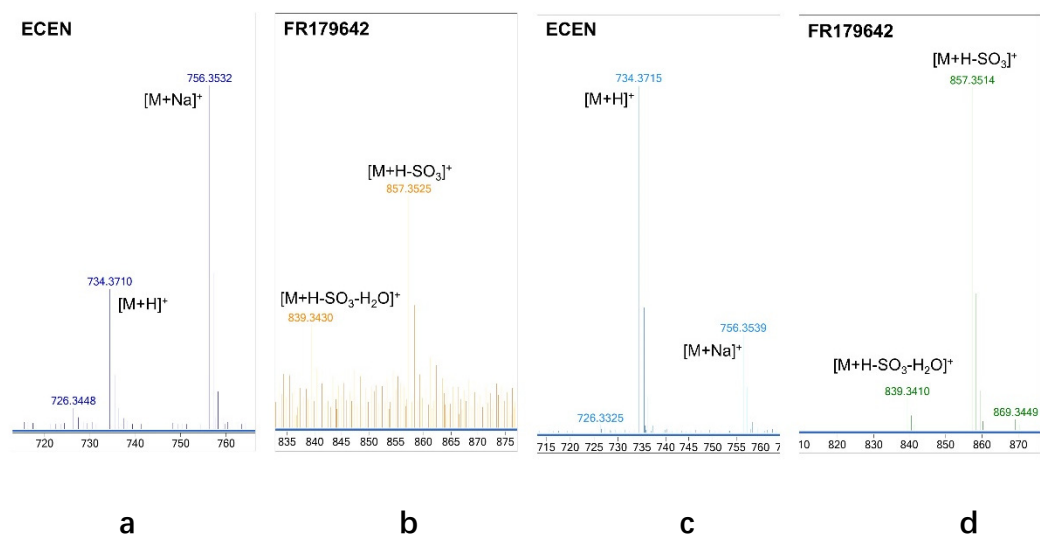

**Figure S2.** High-resolution mass spectra identification the deacylated products of ECEN and FR179642 from ECE and FR901379 by *Streptomyces* SY1965 (**a**, **b**) and recombinant strain *S. lividans* TKecea66 (**c**, **d**).



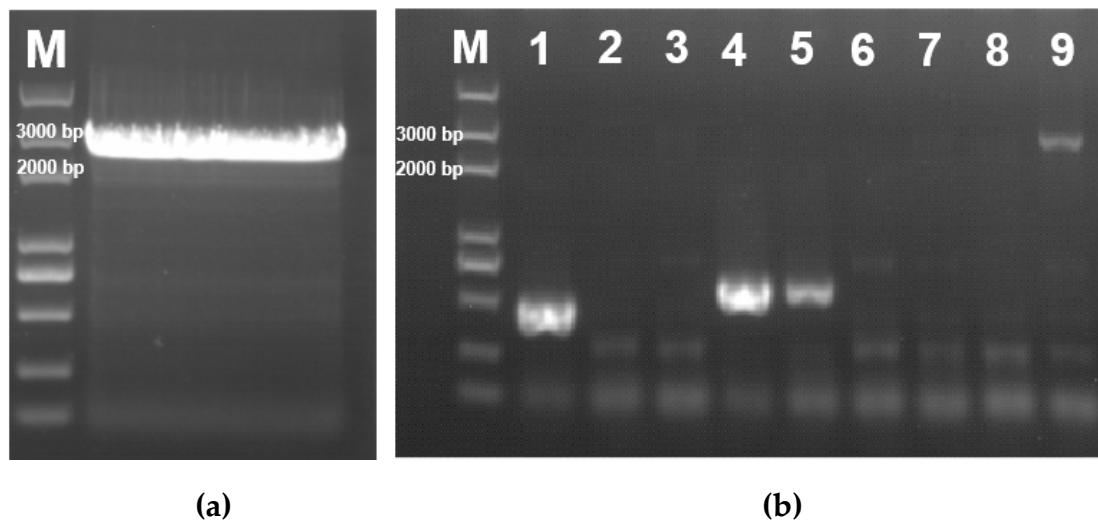

**Figure S3.** Construction of the *ecea* gene overexpression plasmid for intergeneric conjugation. The DNA fragment (2415 bp) amplified from the genomic DNA of *Streptomyces* sp. SY1965 (a); PCR verification of recombinant plasmid pSET-*kasOp*\**ecea* (b). M: DNA Marker; left gel: lanes 1-9 are *E. coli* DH5α transformants; Lane 9 represents the correct construct.



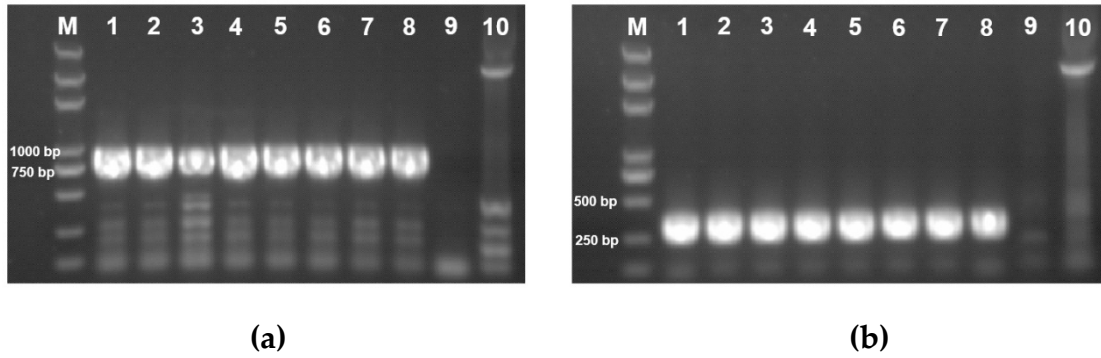

**Figure S6.** PCR verification of the genotype of *S. lividans* TKecea66. Agarose (1%)/TAE gel electrophoresis showing the upstream (a) and downstream (b) junctions flanking the *ecea* gene. M: DNA Marker; lines 1-8: exconjugants; line 9: *S. lividans* TK24; line 10: exconjugant with empty plasmid.

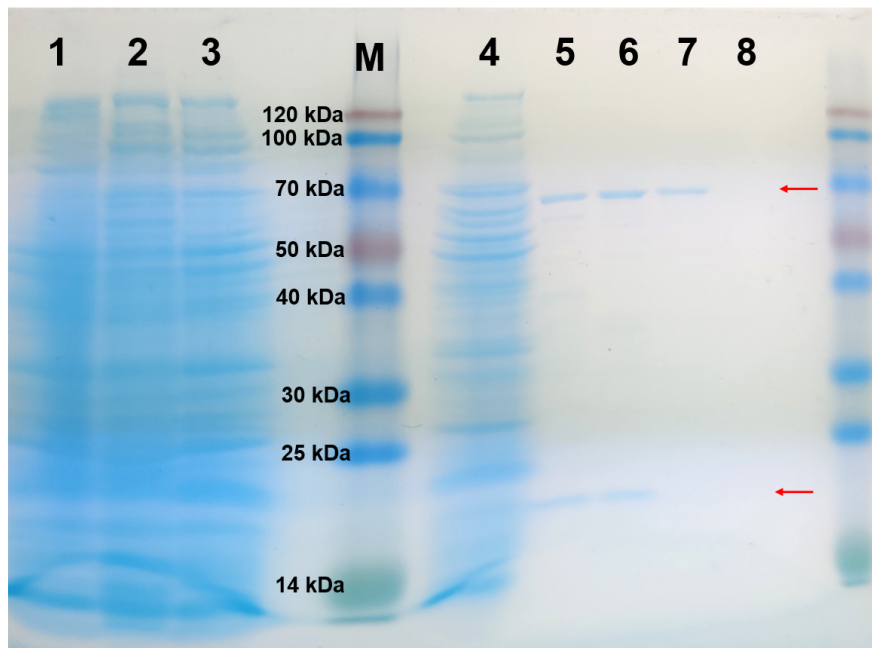

**Figure S7.** SDS-PAGE analysis of the ECEA produced by the recombinant strain *Streptomyces lividans* TKecea66. M: Marker; Lane 1: supernatant of *S. lividans* TK24; lane 2: supernatant of TKecea66; lane 3: *S. lividans* TK24 transferred with an empty pSET152 vector; lane 4: fractions eluted with buffer containing 20 mM imidazole; Lane 5: fractions eluted with buffer containing 50 mM imidazole; line 6: fractions eluted with buffer containing 100 mM imidazole; line 7: fractions eluted with buffer containing 300 mM imidazole; line 8: fractions eluted with buffer containing 500 mM imidazole.

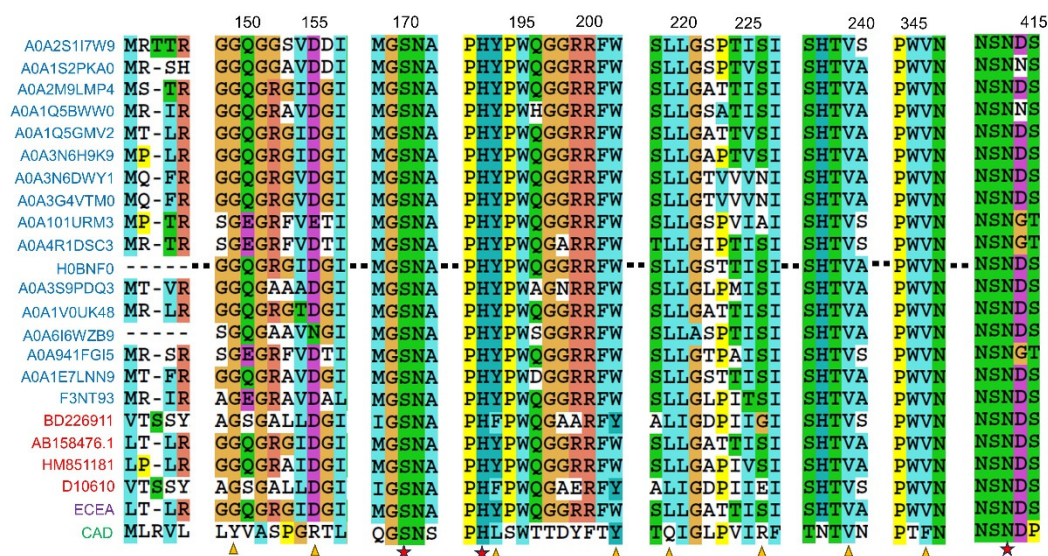

**Figure S8.** Multiple sequence alignment of ECEA, hypothetical ECE acylases (blue), known proteins (red) and a cephalosporin C acyltransferase (CAD, GenBank accession number: AF251710.1, green). Key catalytic sites marked with red stars and active pocket residues marked with triangles. echinocandin B acylase gene (GenBank accession numbers: BD226911, AB158476.1, HM851181, D10610).

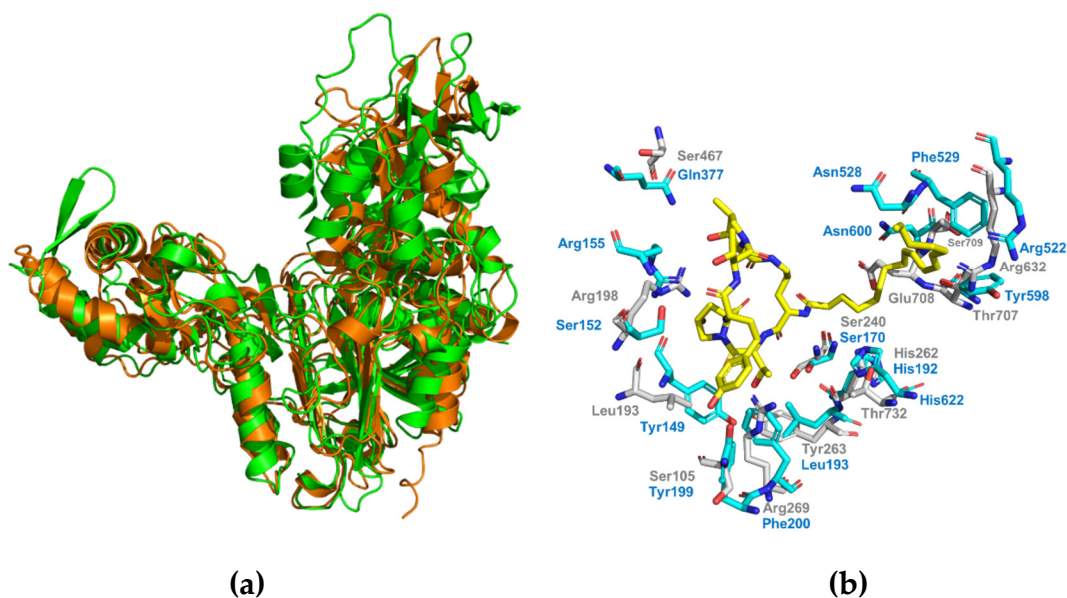

**Figure S9.** Comparison of the structures of ECEA (green) and CPC (orange, PDB code: 1JVZ) (a) RMSD= 2.469. The catalytically critical Ser170 in CPC (cyan) superimposed with the Ser240 of ECEA (gray) (b). The structure of ECEA was generated by Alphafold2.

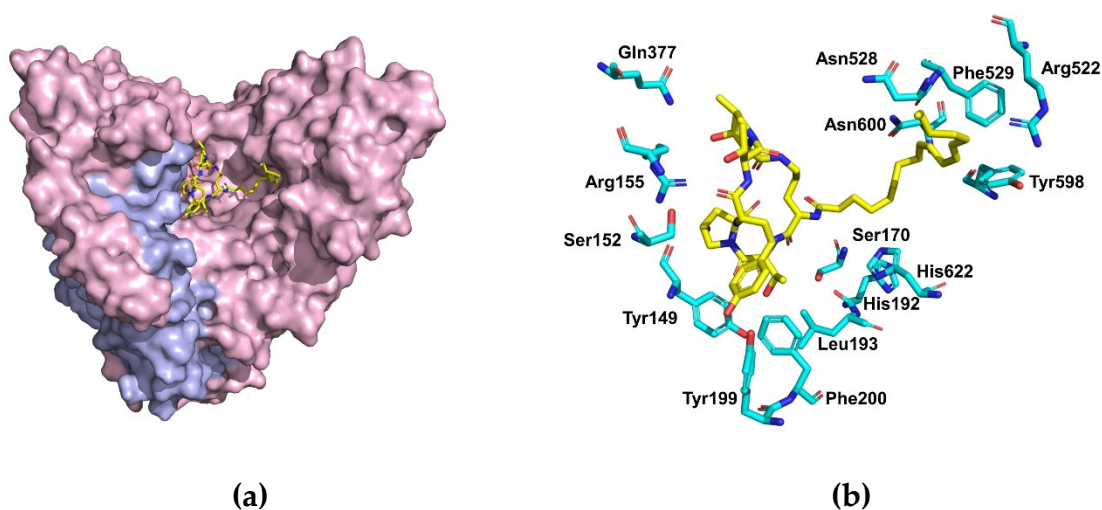

**Figure S10.** The structure (a) of ECE and CPC protein docking that  $\alpha$ -subunit colored by light blue and  $\beta$ -subunit colored by light pink, and shown the key residues (cyan) surrounding substrate of ECE (yellow) within 6 Å (b).

## References

10. Yu, X.; Jiang, Q.; Chen, X.; Shu, H.; Xu, Y.; Sheng, H.; Yu, Y.; Wang, W.; Keller, N.P.; Xu, J. and Wang, P. Unnatural tetradeoxy echinocandins produced by gene cluster design and heterologous expression. *Org. Biomol. Chem.* **2023**, *21*, 3552-3556.
16. Yi, W.; Qin, L.; Lian, X.-Y. and Zhang, Z. New Antifungal Metabolites from the Mariana Trench Sediment-Associated Actinomycete *Streptomyces* sp. SY1965. *Mar. Drugs* **2020**, *18*, 385.
